# Supplementary material for: Assessing the temporal clustering of coastal storm tide hazards under natural variability in a near 500-year model run
Source: Research Square preprint supplement (doi:10.21203/rs.3.rs-5439592/v1), 2024-12-11
Supplement: Supplementary file 1 [file 0f86e72b7d1a3d2def51ebaa.docx]

Supplementary material

**Assessing the temporal clustering of coastal storm tide hazards under natural variability in a near 500-year model run**


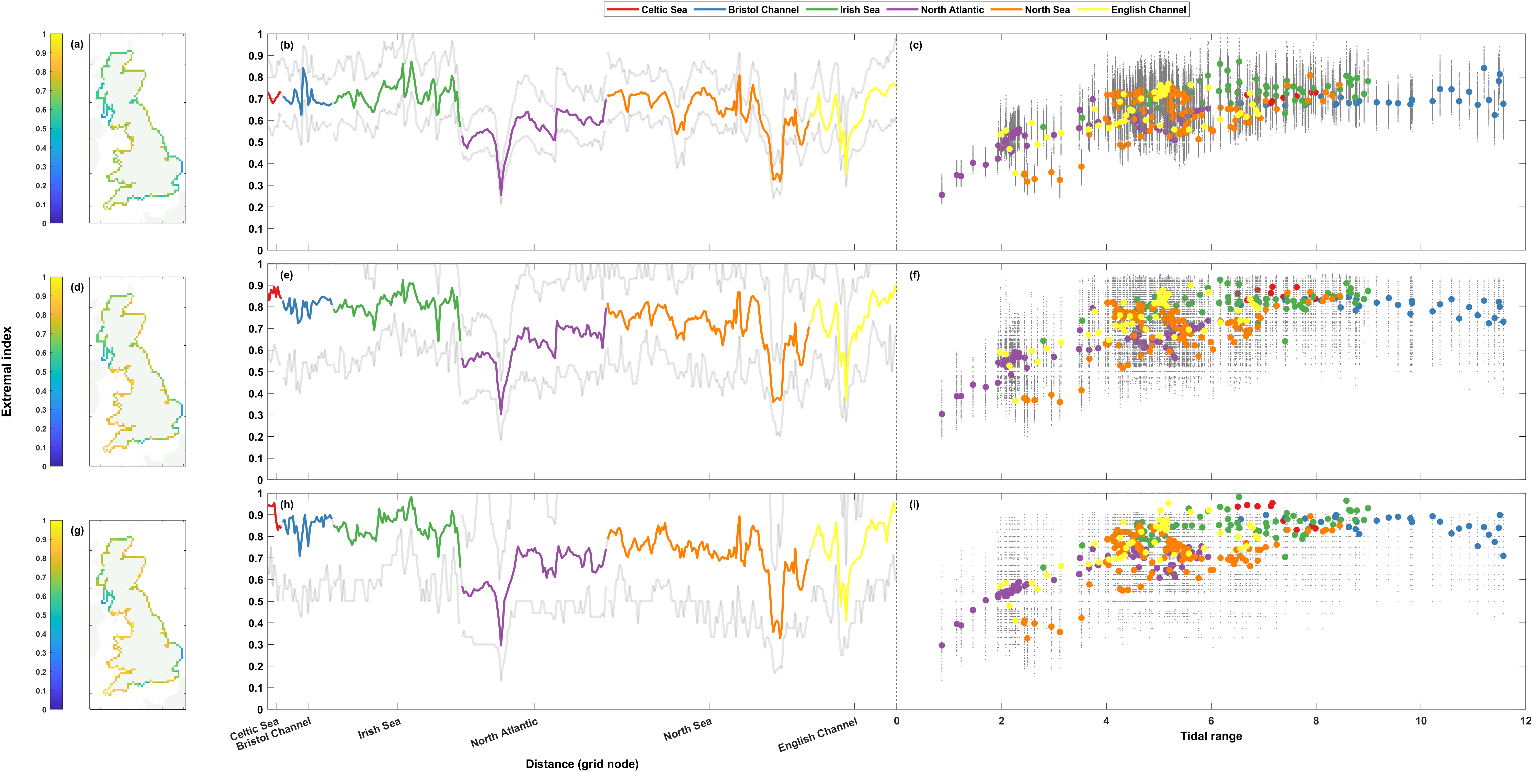


**Fig. S1:** Extremal index (K-gaps) for non-tidal residual timeseries. The top row (**a**-**c**) shows results at the 1 in 1-year return level, the middle row (**d**-**f**) the 1 in 5-year return level, and the bottom row (**g**-**i**) the 1 in 10-year return level. Percentages are shown spatially in panels **a**, **d**, and **g** (left column), clockwise around the coast from the Southwest tip of England ending back at Newlyn in panels **b**, **e**, and **h** (middle column), and finally shown as a scatter plot against maximum non-tidal residual at that grid node in panels **c**, **f**, and **i** (right column). The grey lines (dots) in panels **b**, **e**, and **h** (**c**, **f**, and **i**) show the range of (all) results from the 50-year rolling window analysis.


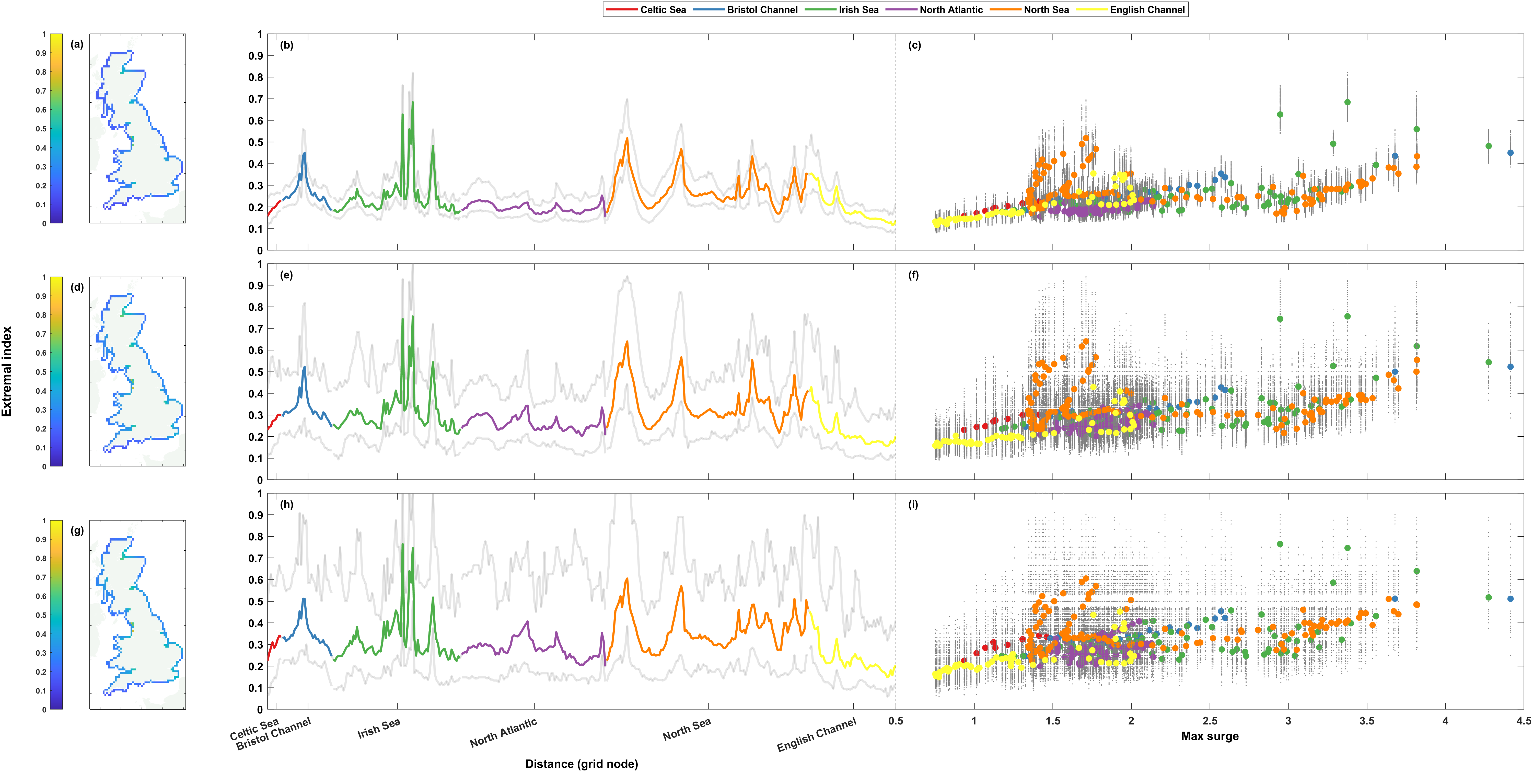


**Fig. S2:** Extremal index (K-gaps) for sea level timeseries. The top row (**a**-**c**) shows results at the 1 in 1-year return level, the middle row (**d**-**f**) the 1 in 5-year return level, and the bottom row (**g**-**i**) the 1 in 10-year return level. Percentages are shown spatially in panels **a**, **d**, and **g** (left column), clockwise around the coast from the Southwest tip of England ending back at Newlyn in panels **b**, **e**, and **h** (middle column), and finally shown as a scatter plot against tidal range at that grid node in panels **c**, **f**, and **i** (right column). The grey lines (dots) in panels **b**, **e**, and **h** (**c**, **f**, and **i**) show the range of (all) results from the 50-year rolling window analysis.
